# Supplementary material
Source: publisher figshare collection journal article supplement (https://gsapubs.figshare.com/ndownloader/files/22758008)
Supplement: Supplementary file 1 [file 22758008]

## **Electronic appendix; Data sources**

### **Figure 2; REE data for volcano suites;**

An important element of our approach is to distinguish suites from individual volcanoes. We have collated data from a number of volcanoes in several different arcs where a common differentiation process is thought to relate the rocks to each other. When volcanoes from the same arc are compared (even volcanoes separated by <100 km), they typically show quite distinct trends, and mixing data from volcanoes in an arc (or arc segment or island) will obscure any trends that may be present.

### **Oceanic Arcs;**

**Tonga:** Acland, S., 1996, Magma genesis in the northern Lau Basin, S.W. Pacific: PhD dissertation. Univ. of Durham.

**Aleutians (Okmok):** Finney, B.M., 2004, Magmatic differentiation at an island-arc caldera: a stratigraphically constrained multi-isotope study of Okmok Volcano, Aleutian Islands, Alaska: [PhD thesis]: University of Bristol, 296 p.

**Aleutians:** George, R., Turner, S., Hawkesworth, C., Nye, C., Bacon, C., Stelling, P., and Dreher, S., 2004, Chemical versus temporal controls on the evolution of tholeiitic and calc-alkaline magmas at two volcanoes in the Aleutian arc: *Journal of Petrology*, v. 45, p. 203-219.

**Anatahan (Marianas):** Wade, J.A., Plank, T., Stern, R.J., Tollstrup, D.L., Gill, J.B., O'Leary, J.C., Eiler, J.M., Moore, R.B., Woodhead, J.D., Tuskell, F., Fischer, T.P. and Hilton, D.R., 2005, The May 2003 eruption of Anatahan volcano, Mariana Islands: Geochemical evolution of a silicic island-arc volcano: *Journal of Volcanology and Geothermal Research*, v. 146, p. 139–170, doi: 10.1016/j.jvolgeores.2004.11.035.

**Lesser Antilles:** Davidson, J.P., 1986, Isotopic and trace element constraints on the petrogenesis of subduction-related lavas from Martinique, Lesser Antilles: *Journal of Geophysical Research*, v. 91, p. 5943-5962.

Davidson, J.P., 1987, Crustal contamination versus subduction zone enrichment: Examples from the Lesser Antilles and implications for mantle source compositions of island arc volcanics: *Geochimica et Cosmochimica Acta*, v. 51, p. 2185-2198.

### **Transitional Arcs;**

**Indonesia:** Handley, H., 2006, Geochemical and Sr-Nd-Hf-O isotopic constraints on volcanic petrogenesis at the Sunda Arc, Indonesia: [PhD thesis]: University of Durham.

Handley, H.K., Macpherson, C.G., Davidson, J.P., Berlo, K. and Lowry, D. (in press) Constraining Fluid and Sediment Contributions to Subduction-Related Magmatism in Indonesia: Ijen Volcanic Complex: *Journal of Petrology*. doi: 10.1093/petrology/egm013

### **Continental Arcs;**

**Cotopaxi (N, Andes):** Garrison, J., 2004, Magmatic processes at Cotopaxi Volcano, Ecuador: Geochemical and petrological constraints, and inferences for continental arc volcanoes: [PhD thesis]: Los Angeles, University of California, 247 p.

**All other data are unpublished (Davidson and Turner).**

### **Figure 4 Ce, H<sub>2</sub>O data for glasses**

Dixon JE and Clague, DA, 2001, Volatiles in basaltic glasses from Loihi seamount, Hawaii: Evidence for a relatively dry plume component: *Journal of Petrology*, v. 42, p. 627-654.

Michael, P., 1995, Regionally distinctive sources of depleted MORB: Evidence from trace elements and H<sub>2</sub>O: *Earth and Planetary Science Letters*, v. 131, p. 301-320.

**Figure 4 Ce, H<sub>2</sub>O data for amphibole**

- Cortosego L, Gaggero L and Zanetti A, 2000, Rare earth and trace elements in igneous and high-temperature metamorphic minerals of oceanic gabbros (MARK area, Mid-Atlantic Ridge): *Contributions to Mineralogy and Petrology*, v. 139, p. 373-393.
- Downes H, Beard A and Hinton R, 2004, Natural experimental charges: an ion-microprobe study of trace element distribution coefficients in glass-rich hornblendite and clinopyroxene xenoliths: *Chemical Geology*, v. 75, p. 1-17.
- Halter WE, Heinrich CA and Pertke T, 2004, Laser-ablation ICP-MS analysis of silicate and sulphide melt inclusions in an andesitic complex II: evidence for magma mixing and magma chamber evolution: *Contributions to Mineralogy and Petrology*, v. 147, p. 397-412.
- Moine, B.N., Grégoire, M., O'Reilly, S.Y., Sheppard, S.M.F. and Cottin, J.Y., 2001, High field strength element fractionation in the upper mantle: evidence from amphibole-rich composite mantle xenoliths from the Kerguelen Islands (Indian Ocean): *Journal of Petrology*, v. 42, p. 2145-2167.
- Witt-Eickschen, G. and O'Neill H.StC., 2005, The effect of temperature on the equilibrium distribution of trace elements between clinopyroxene, orthopyroxene, olivine and spinel in upper mantle peridotite: *Chemical Geology*, v. 221, p. 65-101.
